# Supplementary material
Source: PubMed Central journal article supplement (PMC5347594)
Supplement: pnas.1608106114.sapp.pdf [file pnas.1608106114.sapp.pdf]

# Nanoparticles and dissolved organic matter: a network perspective reveals a decreasing diversity of the materials investigated – Supporting Information Appendix

Nicole Sani-Kast<sup>a</sup>, Jérôme Labille<sup>b,c</sup>, Patrick Ollivier<sup>d</sup>, Danielle Slomberg<sup>b,c</sup>, Konrad Hungerbühler<sup>a</sup>, and Martin Scheringer<sup>a,e,\*</sup>

<sup>a</sup>Institute for Chemical and Bioengineering, ETH Zürich, CH-8093 Zürich, Switzerland

<sup>b</sup>Aix-Marseille Université, CNRS, IRD, CEREGE UMR 7330, 13545 Aix-en-Provence, France

<sup>c</sup>International Consortium for the Environmental Implications of Nanotechnology, ICEINT, Aix-en-Provence, France

<sup>d</sup>BRGM, 3 Avenue C. Guillemin, BP 36009, 45060 Orléans, France

<sup>e</sup>RECETOX, Masaryk University, 625 00 Brno, Czech Republic

\*Corresponding author: scheringer@chem.ethz.ch

## ABSTRACT

Dissolved organic matter (DOM) strongly influences the properties and fate of engineered nanoparticles (ENPs) in aquatic environments. There is an extensive body of experiments on interactions between DOM and ENPs and also larger particles (we denote particles on the nano- and micrometer scale as particulate matter, PM). However, the experimental results are very heterogeneous and a general mechanistic understanding of DOM-PM interactions is still missing. In this situation, recent reviews have called to expand the range of DOM and ENPs studied. Therefore, our work focuses on the diversity of the DOM and PM types investigated. Because the experimental results reported in the literature are highly disparate and difficult to structure, a new format of organizing, visualizing and interpreting the results is needed. To this end we perform a network analysis of 951 experimental results on DOM-PM interactions. This enables us to analyze and quantify the diversity of the materials investigated. The diversity of the DOM-PM combinations studied has mostly been decreasing over the last 25 years. This is driven by an increasing focus on several frequently investigated materials such as DOM isolated from fresh water, DOM in whole-water samples, and TiO<sub>2</sub> and silver PM. Furthermore, there is an underrepresentation of studies into the effect of particle coating on PM-DOM interactions. Finally, it is of great importance that the properties of DOM used in experiments with PM, in particular the molecular weight and the content of aromatic and aliphatic carbon, are reported more comprehensively and systematically.

## Contents of this document

- **Consistency of reported DOM parameters:** (i) a flowchart of the distribution of group-1 DOM in the publications in the database; (ii) a summary of the availability of key parameters of group-1 DOM (pp. 2–4).
- **Frequency and prevalence of materials in the experiments:** (i) a list of abbreviations of particulate matter (PM) and dissolved organic matter (DOM) types that appear in the database; (ii) a heatmap representation of the experimental network (Figure S2). It depicts the frequency of employment of each given DOM-PM combination in the experiments by means of a color gradient; (iii) two sets of bar charts that summarize the temporal trends in

the use of the various materials, separately for DOM and PM (Figures S3 and S4); (iv) a graphical representation of the distributions of whole-water-sample DOM vs. isolated DOM in the empirical network (Figure S5) (**pp. 4–11**).

- **Environmental sources and chemical composition of dissolved organic matter:** Detailed discussion of the results of the principal component analysis of dissolved organic matter (presented in the main text). It explains the distribution of the 80 DOM types analyzed in the lower-dimensional space of their carbon distribution. It presents three figures that summarize this analysis, Figures S6 to S8 (**pp. 12–16**).
- **Comparison to random networks:** Quantitative differences between the empirical network and an ensemble of simulated networks created by a random linking process (**p. 17**).
- **Simulated networks of high and low diversity:** Detailed discussion of the source of variability in the diversity of DOM-PM combinations obtained for the simulated networks of high and low diversity (**p. 17**).
- **Resilience of the empirical network:** Results of tests that investigate the influence of various modifications in the database on the observed diversity of DOM-PM combinations. Specifically: (i) the effect of considering only experiments that employ humic substances as their DOM component; and (ii) bootstrap analysis of the publications in the database (**pp. 18–21**).
- **Temporal dimension of the network's structure:** The empirical network with links colored by the year of study (**p. 21**).
- **Annex A:** Output of the principal component analysis as obtained from the statistics software R (**p. 22**).
- **Annex B:** The R code used to generate the and analyze the bootstrap of the publications in the database (**pp. 22–23**).
- **References:** References for this document (**p. 23**).

## Consistency of reported DOM parameters

### DOM purchased from the International Humic Substances Society

More than 50% of the publications in our database that employ DOM purchased from the International Humic Substances Society (IHSS) do not explicitly report the unique identifier number (Cat. No.) of the DOM. Overall there are 113 publications that employ DOM obtained from the IHSS, out of which 60 do not explicitly state the unique identifier of these materials (Figure S 1). While some publications state that they use the *reference* material, many simply state the name of the material. As explained in the section *Sources and chemical composition of dissolved organic matter from different natural environments* (below), different samples of IHSS DOM from the same source exhibit variations in their chemical composition. These could originate from natural variations and/or variations due to potential changes in the extraction process.

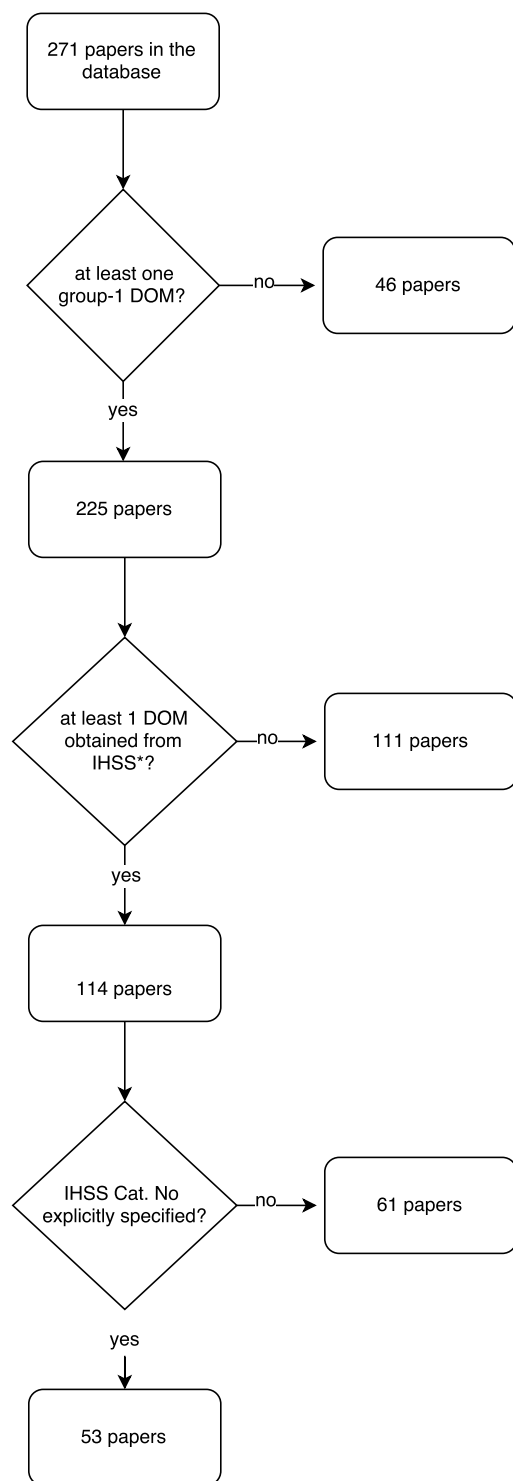

\*International Humic Substances Society

**Figure S 1.** Fractionation of the publications in the database according to their usage of DOM from the IHSS.

### **Availability of group-1 DOM properties**

There are 62 publications that employ at least two group-1 DOM types. In 18 of these publications molecular weight is unknown for some of the studied group-1 DOM, and in 17 publications molecular weight is unknown for all of the studied group-1 DOM (similar proportions are found also for elemental composition, SUVA and  $^{13}\text{C}$  NMR spectra). This observation means that in such publications where a given property – such as molecular weight, elemental composition, SUVA and  $^{13}\text{C}$  NMR spectra – is known for only some of the studied DOM (if at all), this property cannot be used to interpret the results. There are only 21 publications that employ more than one group-1 DOM type and for which all the above parameters are known / measured for all the employed group-1 DOM.

### **Frequency and prevalence of materials in the experiments**

#### **Abbreviations**

Tables S1 and S2, see next pages, detail the abbreviations of the different types of particulate matter (PM) and dissolved organic matter (DOM) employed in the experiments included in our database.

**Table S 1.** Particulate matter (PM) abbreviations. NP: nanoparticles

| abbreviation                             | meaning                                                                                                                     |
|------------------------------------------|-----------------------------------------------------------------------------------------------------------------------------|
| Acr-Au                                   | acrylate-stabilized gold NP                                                                                                 |
| Al-SiO <sub>2</sub>                      | Al <sup>+</sup> -functionalized silica NP                                                                                   |
| AmherstHA-Al <sub>2</sub> O <sub>3</sub> | Al <sub>2</sub> O <sub>3</sub> coated with Amherst peat soil humic acid                                                     |
| AmherstHA-TiO <sub>2</sub>               | AmherstHA-coated TiO <sub>2</sub> NP                                                                                        |
| AmherstHA-ZnO                            | AmherstHA coated ZnO                                                                                                        |
| amine-peg-QDCdSe ZnS                     | amine polyethylene glycol (PEG)-functionalized CdSeZnS                                                                      |
| amine-QDCdSe                             | amine-functionalized cadmium selenium, quantum dot (eFluor)                                                                 |
| ARSHAP                                   | alizarin red S labeled hydroxyapatite nanoparticles                                                                         |
| B                                        | boron                                                                                                                       |
| carb-paa-QDCdTe CdS                      | carboxylic polyacrylic acid-functionalized CdTe CdS                                                                         |
| carb-peg-QDCdSe ZnS                      | carboxylic polyethylene glycol (PEG)-functionalized CdSe ZnS                                                                |
| carb-QDCdSe                              | carboxyl functionalized cadmium selenium, zinc sulfate quantum dot (eFluor)                                                 |
| Dmsa-TiO <sub>2</sub>                    | dmsa (dimercaptosuccinic acid) coated TiO <sub>2</sub> NP                                                                   |
| Fh                                       | ferrihydrate                                                                                                                |
| Ga-Ag                                    | gum-arabic coated Ag NP                                                                                                     |
| Hf(0.37)ZrO <sub>2</sub> (0.63)          | particles containing a mixture of Hf and ZrO <sub>2</sub>                                                                   |
| Hmc-Ag                                   | hydroxylammonium chloride stabilized Ag NP                                                                                  |
| latex-amidine                            | amidine modified latex particles                                                                                            |
| latex-sulf                               | latex sulfonate                                                                                                             |
| Lig-TiO <sub>2</sub>                     | lignin-coated TiO <sub>2</sub> NP                                                                                           |
| Mag-Fe <sub>2</sub> O <sub>3</sub>       | magnetic Fe <sub>2</sub> O <sub>3</sub>                                                                                     |
| mix1-ALSiO                               | mixture of 27% montmorillonite, 24% illite and 38% kaolinite                                                                |
| mix2-ALSiO                               | mixture of 20% montmorillonite, 29% illite and 45% chloride                                                                 |
| mix3-ALSiO                               | mixture of 45% montmorillonite, 18% illite and 30% kaolinite                                                                |
| Mua-Au                                   | 11-mercaptoundecanoic acid coated gold NP                                                                                   |
| oa-QDCdSe                                | oleic acid coated cadmium selenium quantum dots                                                                             |
| Oh-SiO <sub>2</sub>                      | OH-functionalized silica NP                                                                                                 |
| PAA-CeO <sub>2</sub>                     | polyacrylic acid CeO <sub>2</sub>                                                                                           |
| paa-Fe                                   | polyacrylic acid coated NZVI (nanoscale zero-valent iron)                                                                   |
| peg-QDCdSe                               | polyethylene glycol coated cadmium selenium quantum dot (eFluor)                                                            |
| Peptone-Al <sub>2</sub> O <sub>3</sub>   | peptone-coated Al <sub>2</sub> O <sub>3</sub>                                                                               |
| Peptone-TiO <sub>2</sub>                 | peptone-coated TiO <sub>2</sub> NP                                                                                          |
| Peptone-ZnO                              | peptone-coated ZnO                                                                                                          |
| PMMA                                     | poly(methylmethacrylate nanoparticles)                                                                                      |
| PMMA-PHEMA                               | poly(methylmethacrylate-co-hydroxyethylmethacrylate) nanoparticles                                                          |
| PMMA-PSMA                                | poly(methylmethacrylate-co-stearylmethacrylate) nanoparticles                                                               |
| Pogto-Ag                                 | polyoxyethylene glycerol trioleate coated Ag NP                                                                             |
| protein-Ag                               | protein-capped Ag NP                                                                                                        |
| Pvp-Ag                                   | polyvinylpyrrolidone-coated Ag NP                                                                                           |
| Sds-methacrylate                         | SDS stabilized methacrylate NP                                                                                              |
| srnom-Fe <sub>2</sub> O <sub>3</sub>     | Suwannee River natural organic matter coated Fe <sub>2</sub> O <sub>3</sub>                                                 |
| starch-Ag                                | starch-capped AgNP                                                                                                          |
| Ta-Al <sub>2</sub> O <sub>3</sub>        | tannic-acid-coated Al <sub>2</sub> O <sub>3</sub>                                                                           |
| Ta-TiO <sub>2</sub>                      | tannic-acid-coated TiO <sub>2</sub> NP                                                                                      |
| Ta-ZnO                                   | tannic-acid-coated ZnO NP                                                                                                   |
| teos-Fe                                  | tetraethyl orthosilicate coated Fe NP                                                                                       |
| TiO <sub>2</sub> /AC                     | TiO <sub>2</sub> and activated carbon                                                                                       |
| TiO <sub>2</sub> -TN                     | titanium dioxide titanate nanotubes (TiO <sub>2</sub> HxNa <sub>2-x</sub> Ti <sub>3</sub> O <sub>7</sub> )                  |
| T-lite                                   | TiO <sub>2</sub> coated with hydrated silica, dimethicone/methicone copolymer, and aluminum hydroxide (purchased from BASF) |
| Tma-bentonite                            | tetramethylammonium bromide coated bentonite                                                                                |
| Tma-kaolinite                            | tetramethylammonium bromide coated kaolinite                                                                                |
| TN                                       | titanate nanotubes (HxNa <sub>2-x</sub> Ti <sub>3</sub> O <sub>7</sub> )                                                    |
| topo-Hf(0.37)ZrO <sub>2</sub> (0.63)     | trioctylphosphine oxide coated Hf(0.37)ZrO <sub>2</sub> (0.63)                                                              |
| topo-HfO <sub>2</sub>                    | trioctylphosphine oxide coated HfO <sub>2</sub>                                                                             |
| topo-QDCdSe                              | trioctylphosphine oxide coated cadmium selenium quantum dots                                                                |
| topo-ZrO <sub>2</sub>                    | trioctylphosphine oxide coated ZrO <sub>2</sub>                                                                             |
| tween20-Ag                               | tween20 coated Ag NP                                                                                                        |
| tween20-Fe                               | tween20 coated NZVI (Fe)                                                                                                    |
| Z-cote                                   | ZnO coated with triethoxycaprylsilan (purchased from BASF)                                                                  |

**Table S 2.** Dissolved organic matter (DOM) abbreviations

| abbreviation | meaning                                                                     |
|--------------|-----------------------------------------------------------------------------|
| 2,3-DHBA     | 2,3-dihydroxybenzoic acid                                                   |
| BSA          | bovine serum albumin                                                        |
| CAPA         | capric acid                                                                 |
| CAPRYA       | caprylic acid                                                               |
| CMC          | carboxymethyl cellulose                                                     |
| CTAB         | cetyltrimethylammonium bromide (amine-based cationic quaternary surfactant) |
| EPS          | extracellular polymeric substance                                           |
| HMM acid     | hydrophilic macromolecular acids                                            |
| JBR215       | rhamnolipid (a glycolipid)                                                  |
| LA           | lauric acid                                                                 |
| MWAP71       | bacterial polysaccharide                                                    |
| PAA          | polyacrylic acid                                                            |
| PAH          | polycyclic aromatic hydrocarbon                                             |
| PAM          | polyacrylic co maleic acid                                                  |
| PAP          | polyaspartate                                                               |
| PGUA         | poly(galacturonic acid), a polysaccharide (pectic acid)                     |
| PHEMA        | poly 2-hydroxyethyl methacrylate                                            |
| PMA          | polymaleic acid                                                             |
| PSS          | poly(styrene sulfonate)                                                     |
| PVP          | polyvinylpyrrolidone                                                        |
| R95          | rhamnolipid (glycolipid)                                                    |
| RMDP17       | bacterial polysaccharide                                                    |
| STP effluent | sewage treatment plant effluent                                             |
| STP influent | sewage treatment plant influent                                             |
| YAS34        | bacterial polysaccharide                                                    |

### **Frequency and prevalence of materials in the experiments: heatmap**

Figure S 2 depicts in a “heatmap” the prevalence of materials in the experiments included in our database. The sparsity of the experimental field is evident here by the large blank areas in the heatmap. These blank areas correspond to combinations of PM and DOM that have not been studied yet.

### **Frequency and prevalence of materials in the experiments: bar charts**

The temporal distributions of the DOM types and PM types used in the experiments between 1990–2015 are shown in Figure S 3 and Figure S 4, respectively. These Figures support the interpretation of Figures 3b and 3c in the main text.





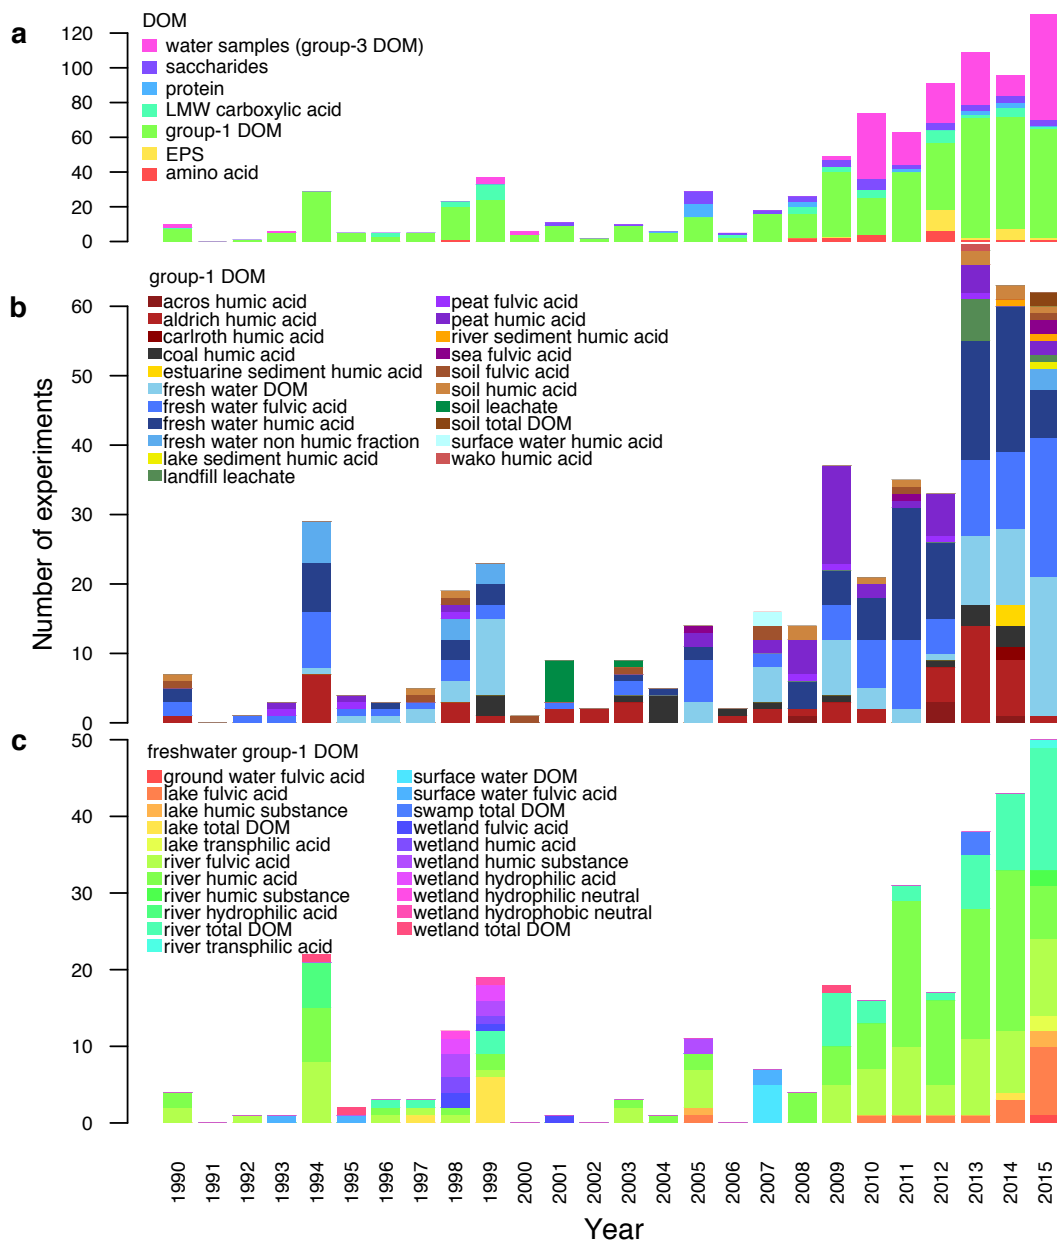

**Figure S 3.** Temporal trends in the use of DOM types between 1990–2015. **a**, distribution of group-1, group-2 and group-3 DOM, where group-2 DOM is separated into specific groups of material types; **b**, temporal distribution of group-1 DOM only; **c**, temporal distribution of fresh water group-1 DOM only.

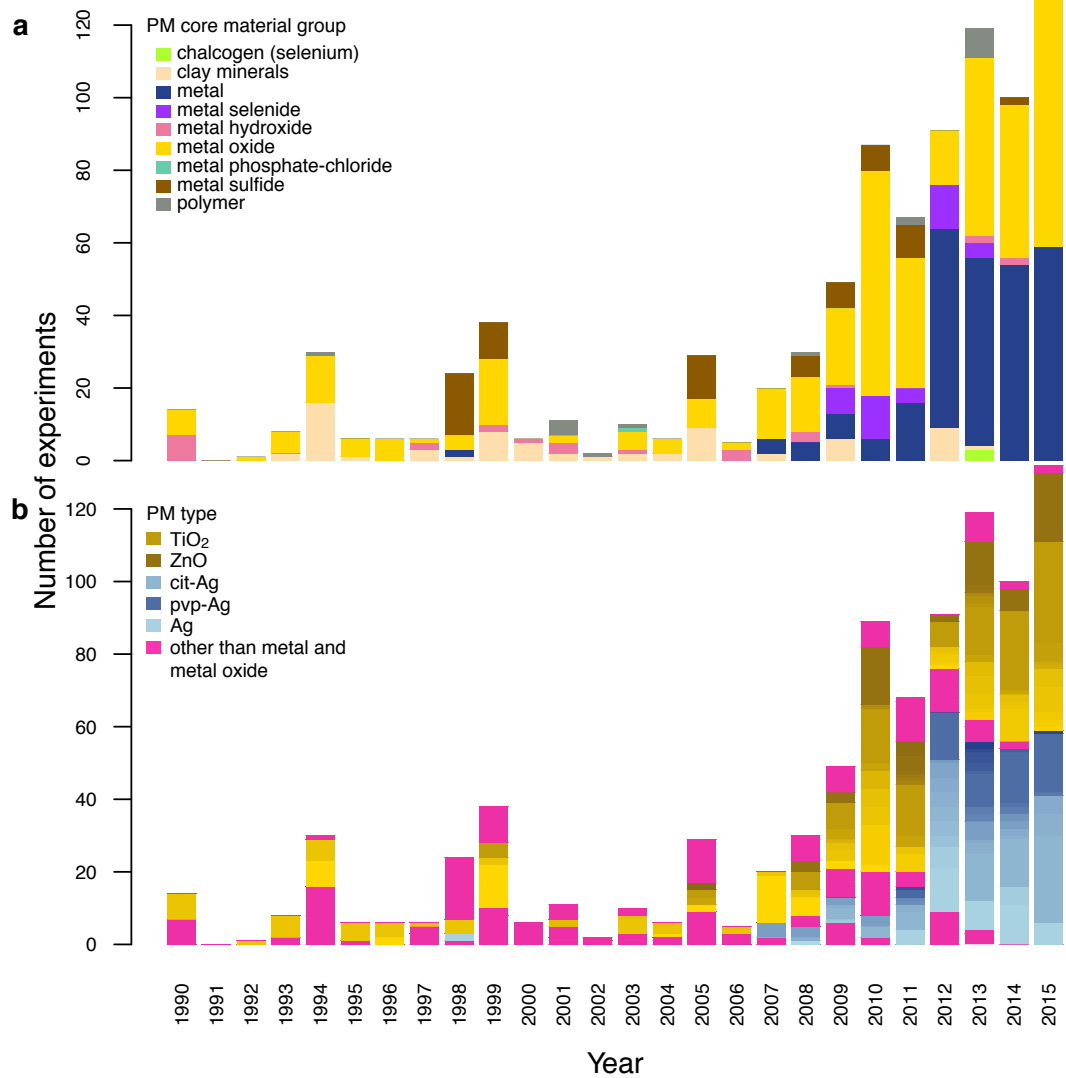

**Figure S 4.** Temporal trends in the use of PM types between 1990–2015. **a**, PM aggregated based on groups of core materials; **b**, temporal trends of selected PM types.

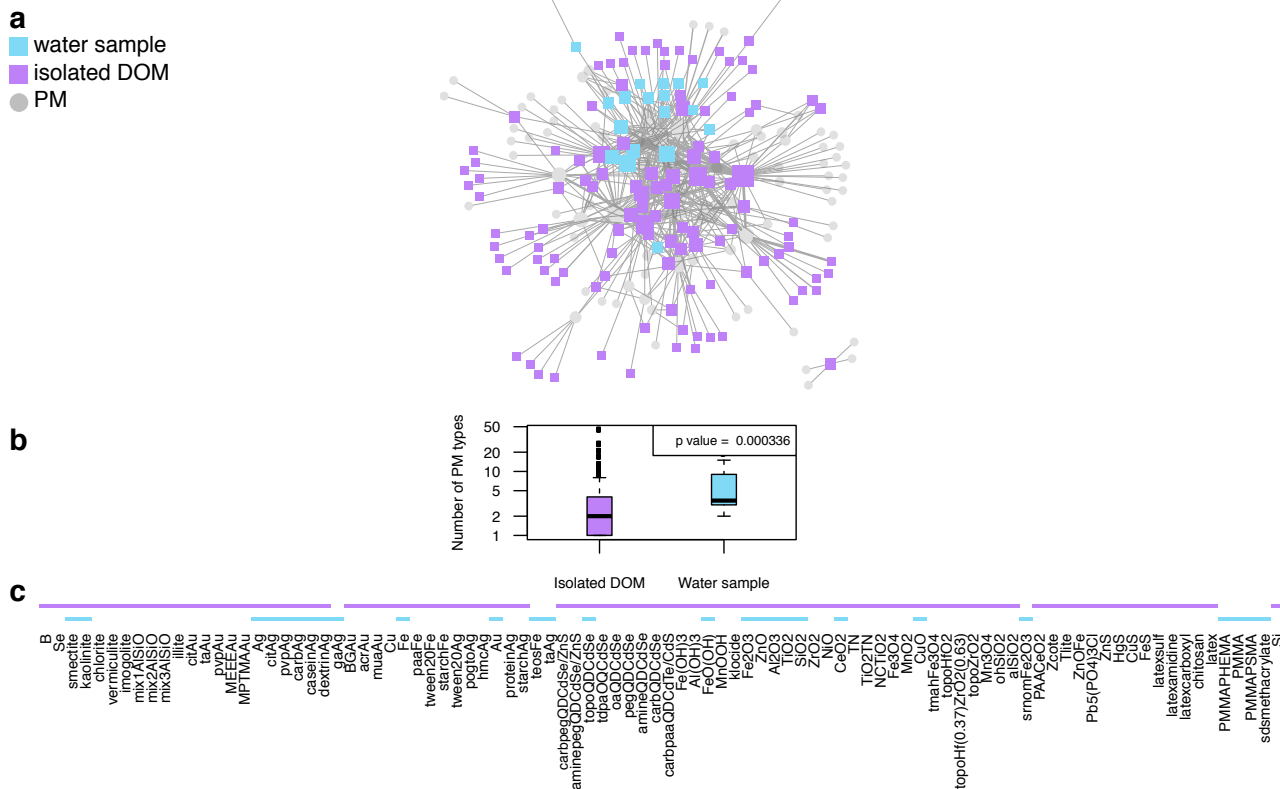

**Figure S 5.** Differences between water samples vs. isolated DOM in the empirical network. **a**, the empirical network; nodes representing water samples are colored in light blue; nodes for isolated DOM are colored in purple. The size of the nodes is proportional to the degree of the nodes. **b**, boxplots showing the distributions of the number of PM types studied with water-sample DOM vs. the number of PM types studied with isolated DOM, i.e., the degrees of the DOM nodes. The  $p$  value is for the two-sample, non-parametric Mann-Whitney U test (alternative hypothesis: water samples are studied with more PM types than isolated DOM). **c**, range of PM types studied with isolated DOM (purple) vs. water samples (light blue). The PM types labeled at the bottom are ordered by type (e.g. clay minerals, metals and metal oxides).

## Environmental sources and chemical composition of dissolved organic matter

Figure S 6 depicts the distribution of the 80 DOM samples that were used in the principal component analysis (PCA) in the two-dimensional space spanned by the first two principal components (PC1 and PC2). Figure S 7 depicts the same distribution, but without the labels of the individual samples and with several domains of certain DOM types highlighted.

The PC1 and PC2 values of a given DOM sample are the weighted averages of its aliphatic, aromatic and carbonyl carbon contents, and are defined as:

$$\text{PC1} = 0.67 \cdot \%C_{\text{aliphatic}} - 0.57 \cdot \%C_{\text{aromatic}} - 0.47 \cdot \%C_{\text{carbonyl}},$$

$$\text{PC2} = -0.59 \cdot \%C_{\text{aromatic}} + 0.81 \cdot \%C_{\text{carbonyl}}.$$

Fulvic acids, in general, have higher values of PC2 compared to humic acids, which reflects their lower aromatic carbon content, see Figure S 6. This observation is in accordance with the literature, reporting lower aromatic carbon content in fulvic acids than in humic acids from the same environment<sup>1</sup>.

Most marine DOM samples in this analysis have high PC1 values compared to the DOM samples from non-marine environments (i.e. marine DOM has high PC1 values and is mostly located to the right of the other DOM samples in Figure S 7). This indicates that marine DOM has a higher content of aliphatic carbon compared to DOM from fresh water and from soil. This observation is in agreement with differences between DOM from marine and terrestrial environments, as reported in the literature. Specifically, DOM originating from terrestrial sources tends to have high aromatic carbon content compared to marine DOM, whereas the latter exhibits high content of branched aliphatic carbons<sup>2</sup>.

There are several relatively small regions in Figure S 7 that correspond to DOM samples that share similar values of the first two PCs. This reflects high similarity of chemical composition such as the one observed for river fulvic acids (region 1) and river humic acids (region 3, with Ogeechee river humic acid being an outlier and marked with *C*). Our results confirm previous results that show high similarity of river fulvic acids across rivers of different characteristics<sup>1</sup>. Another relatively small region is that of estuarine sediment humic acid (region 5), which exhibits both high aliphaticity as well as relatively high aromatic carbon content. An exception is Chesapeake bay sediment humic acid (dot marked by *F*), which has higher aromaticity than the other estuarine sediment humic acids. Regions of larger sizes correspond to DOM samples from similar environments that exhibit larger variability in one or two of the PCs values. For example, soil fulvic acid fractions in region 2 span a wide range of PC1 values, corresponding to a large variability in the aliphatic carbon content. However, the narrow range of PC2 values for region 2 indicates that all samples of soil fulvic acid fractions in our analysis have similar content of aromatic carbon. Overall, the majority of DOM from aquatic sources lie in the upper left and upper right regions, with the upper left region being dominated by freshwater DOM.

The proximity of aldrich humic acid, labeled with *D* in Figure S 7, to the soil and coal humic acids provides an indication that this material has terrestrial origin, as was suggested multiple times in the literature.

Soil humic acids are the most scattered material in the PC1-PC2 space. They occupy all but the upper right quadrant of the space (Figure S 6). This corresponds to a diverse chemical composition of soil humic acids, which can originate from either the high heterogeneity of soil composition or sensitivity of sample compositions to DOM extraction procedures, or both. The chemical composition of soil humic acids ranges from materials having both high aliphatic and

aromatic carbon content (lower-right quadrant), high aromatic and low aliphatic carbon content (lower-left quadrant), and low aliphatic and low aromatic carbon content (upper-left quadrant). The effect of the DOM extraction and purification methods can not be ruled out as a contributor to the high variability in the measured chemical composition of soil humic acids. Notably, it has been suggested that extraction and purification methods of soil humic acids may affect the measured carbon content to an extent that can modify the measured aromaticity of the extracted fulvic and humic acid fractions<sup>1</sup>. Moreover, the International Humic Substances Society (IHSS) states that humic acids isolated from soils are not operationally equivalent to humic acids extracted from aquatic origin, since the former ones may contain, in addition, hydrophilic acids<sup>3</sup>.

We strongly recommend that authors of experimental papers always report the reference number of DOM samples that were purchased from the IHSS. Our results show that chemical composition of different reference samples of DOM from the same source can vary substantially. We observe that in our DOM-PM experimental database the reference number of DOM from IHSS is not always reported (see section *Consistency of reported DOM parameters* above). Such missing information impedes any attempts to chemically characterize the DOM employed in the various experiments, and therefore makes it difficult or even impossible to compare quantitative results from different experiments. We observe that the variability in chemical composition of different reference materials from the same source increases in the following order: river fulvic acids (e.g. *A1* and *A2*), river humic acids (e.g. *B1* and *B2*), and soil humic acids (e.g. *E1* and *E2*).

Figure S 8a compares the distribution of euclidean distances, in the PC1-PC2 space, between materials from the same environment type to the distribution of distances among materials from different environment types (note that distances from a given material to itself were excluded in order not to bias the distribution towards lower values by including the zero distance from a material to itself). Overall, materials from the same environment types tend to be located closer to each other in the PC1-PC2 space. This proximity, which reflects similarities in the carbon distribution of the respective materials, is unlikely to be coincidental: when the DOM sample locations in the PC1-PC2 space were associated randomly with environmental sources, the difference between the two distributions disappears (see Figure S 8b).

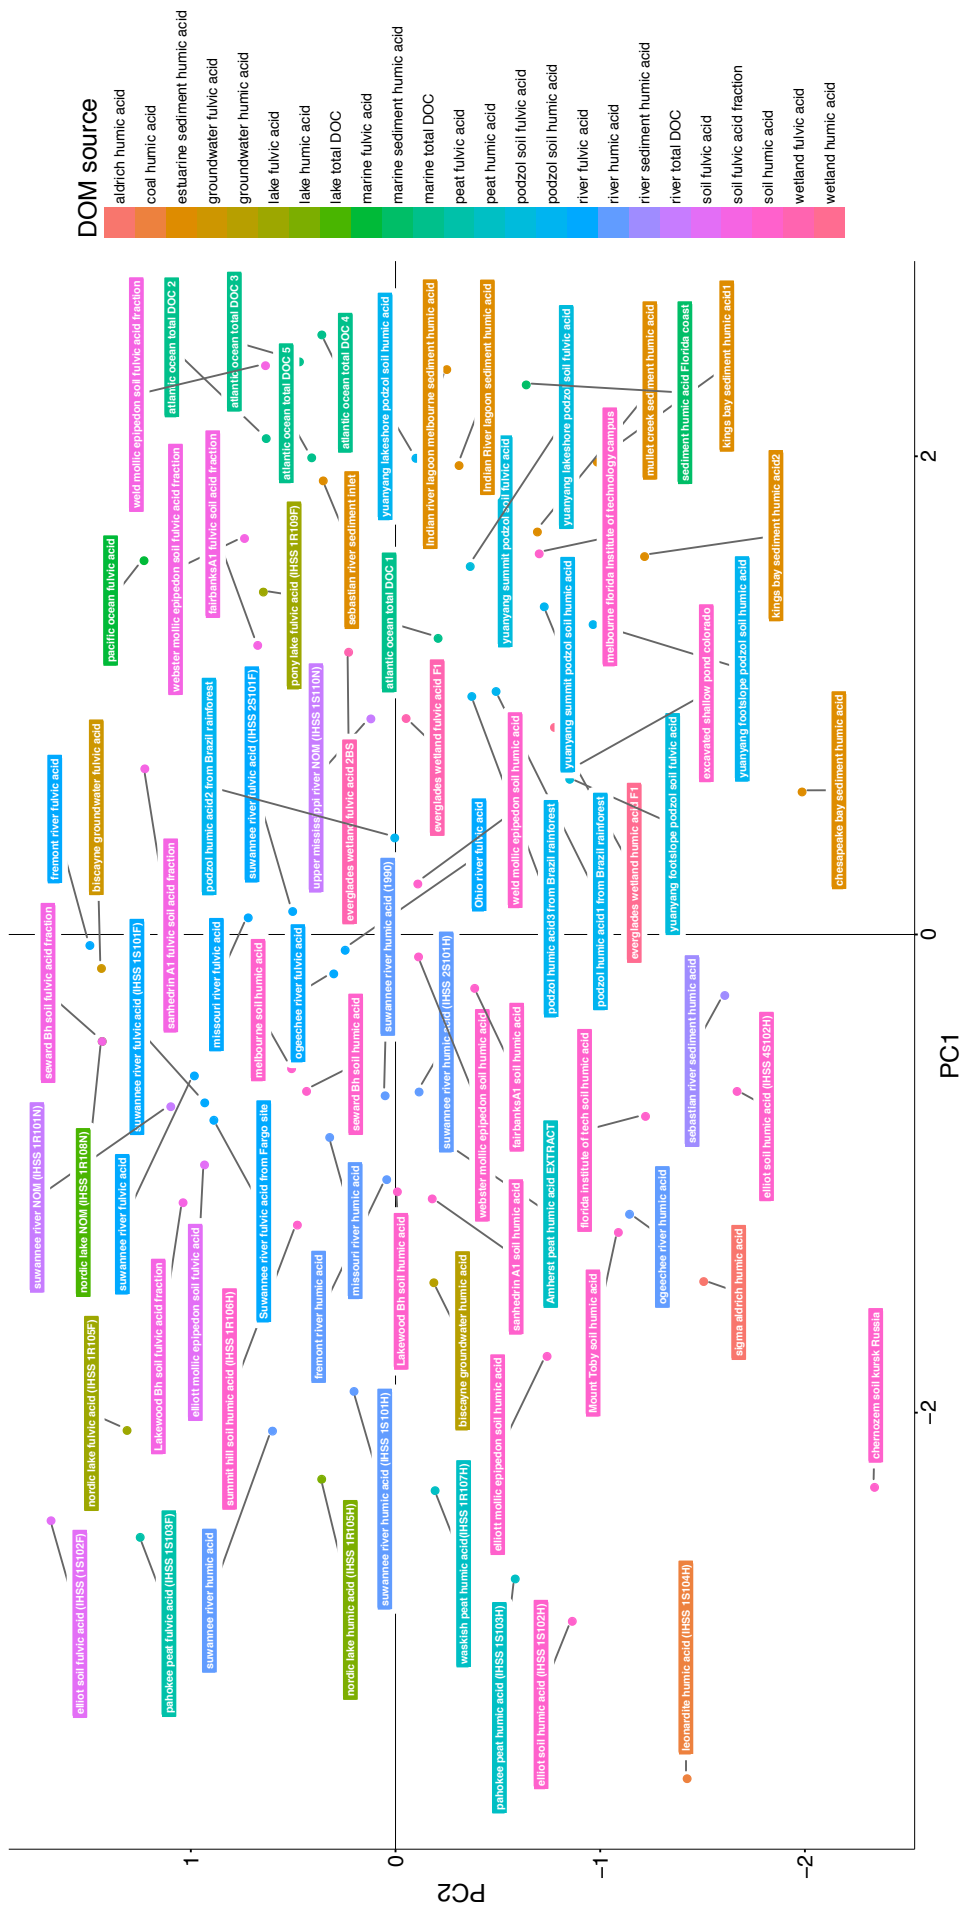

**Figure S 6.** Distribution of various DOM samples in a lower-dimensional representation of their carbon distribution space, given by the first two principal components. The environmental sources of the materials are listed in the legend and in the labels of the individual data points.

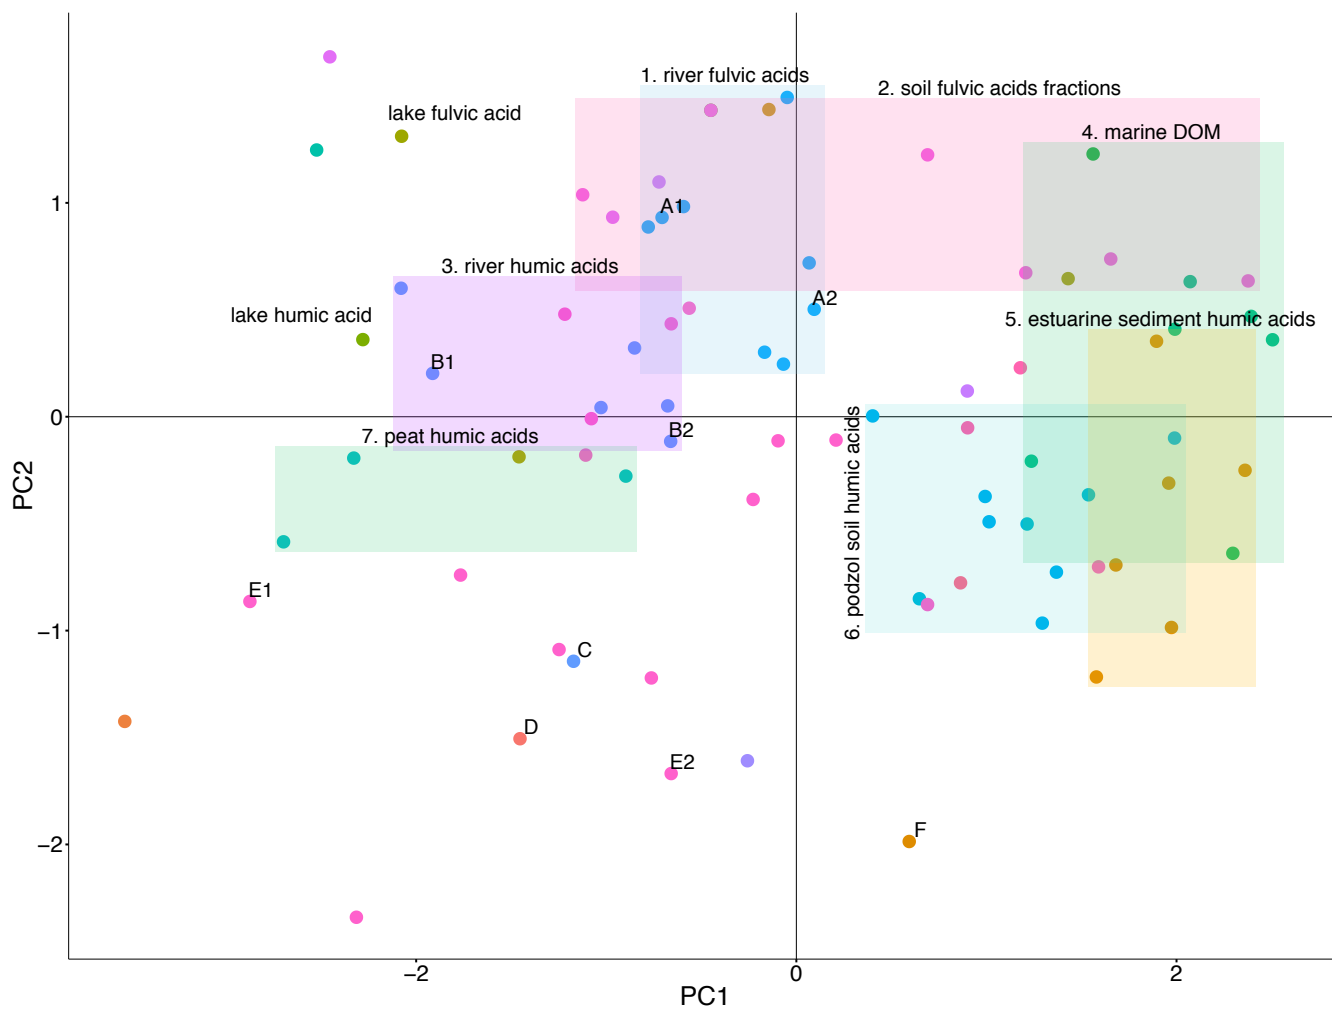

**Figure S 7.** Distribution of the unlabeled DOM samples in a lower-dimensional representation of their carbon distribution space, given by the first two principal components. The colored rectangles mark regions that include sets of materials from similar environments, as indicated by their labels. **A1-2**, **B1-2** and **C1-2** are different IHSS standards of Suwanee river fulvic acid, Suwanee river humic acid and Eliot soil humic acid, respectively. **D** is Aldrich humic acid, and **F** is Chesapeake bay sediment humic acid.

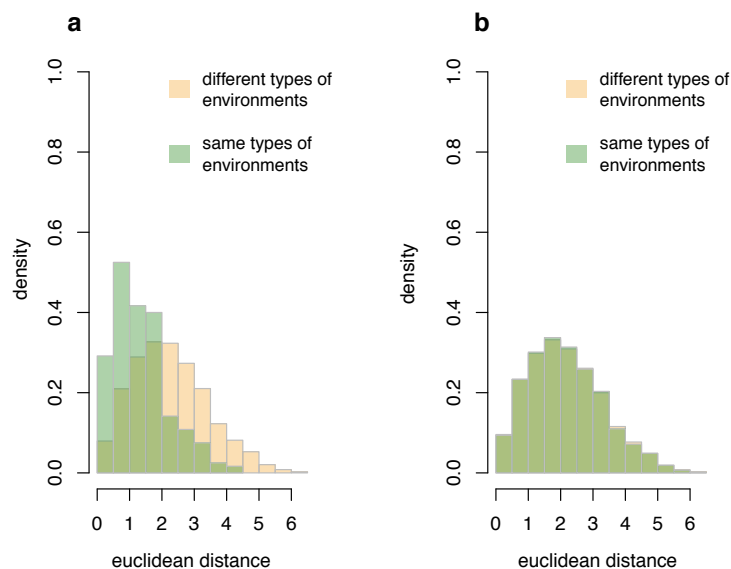

**Figure S 8.** Euclidean distances between the different DOM types in the two dimensional space spanned by the first two principal components. The distribution of the distances is separated into distances among DOM fractions from the same environment type (e.g. river fulvic acids) and distances among DOM fractions from different environment types (e.g. river fulvic acid vs. soil fulvic acid). **a**, distances as calculated on the original data (Figure S7). **b**, distances calculated for randomized data (i.e. randomized data resulted in disassociation between the location in the principal component dimensions in Figure S7 and the type of environmental source of the DOM).



## Comparison to random networks

The following section highlights the most important topological features in the empirical network. To specify these features, we identify which features are unlikely to be found in an ensemble of random networks of comparable size and link density as our empirical network.

The empirical network has a density,  $p$ , that is the fraction of existing links out of all possible links, i.e. the number of DOM-PM combinations studied out of all possible combinations. The density is calculated as  $\rho = \frac{|E|}{|U| \cdot |V|}$ ;  $E$ ,  $U$  and  $V$  are the sets of links, of nodes of DOM type, and of nodes of PM types, respectively. For the empirical network investigated here,  $\rho = 4.3\%$ .

The random networks were simulated by means of the  $G(n, p)$  model implementation for a bipartite network. For each pair of nodes a link is created with probability  $p$ , here  $p = \rho$ . This ensures that the random and empirical networks have similar densities (see Table S3), and therefore the main difference between the networks is the configuration of links, which causes different topological features.

**Table S 3.** Comparison between main parameter values of the empirical network and of 1000 random realizations of networks obtained by the  $G(n, p)$  model adjusted for bipartite networks.

| parameter                         | empirical | random <sup>a</sup> |
|-----------------------------------|-----------|---------------------|
| mean degree <sup>b</sup>          | 4.7       | [4.3, 5.1]          |
| diameter <sup>c</sup>             | 6 *       | [7, 9]              |
| density $\rho$ <sup>d</sup>       | 0.043     | [0.039, 0.046]      |
| degree assortativity <sup>e</sup> | -0.31 *   | [-0.22, -0.054]     |

<sup>a</sup> 95% confidence interval for 1000 random network realizations defined as the range of values between the 2.5–97.5% empirical quantiles.

\* Value lies outside the 95% confidence interval defined above.

<sup>b</sup> The mean degree is the average number of links per node in the network.

<sup>c</sup> The network diameter is the longest geodesic (shortest) path found for any pair of nodes in the network

<sup>d</sup> Network density ( $\rho$ ), describes the fraction of links present in the network out of all possible links,  $\rho = \frac{|E|}{|U| \cdot |V|}$ , where  $|E|$ ,  $|U|$  and  $|V|$  are the numbers of links, of DOM nodes, and of PM nodes in the network.

<sup>e</sup> Degree assortativity ( $r$ ) is the correlation between the degree (number of links) of neighboring nodes,  $r \in [-1, 1]$ ; for a completely random network  $r \approx 0$ .

## Simulated networks of high and low diversity

In the high-diversity simulation each experiment almost always adds new DOM-PM combinations to the network, i.e. creates new links. Therefore, the diversity index,  $D_{\text{comb}}$ , is similar for all 1000 high-diversity networks simulated in each year (indicated by the narrow  $D_{\text{comb}}$  ranges in the upper series of boxplots, Figure 2a in the main text). On the other hand,  $D_{\text{comb}}$  values vary considerably between the 1000 low-diversity networks simulated in each year (lower series of boxplots, Figure 2a in the main text). This variability results from the way DOM-PM combinations are sampled in the construction of the low-diversity networks; when all DOM-PM combinations in the cited references of a given paper were studied with the same frequency, the DOM-PM combinations assigned to that given paper are sampled uniformly at random from the previously studied ones, which yields a large variation in the number of combinations studied ( $n_{\text{comb}}$ ) and therefore a large variation in  $D_{\text{comb}}$ .

## Resilience of the experimental network

### Bootstrap of publications in the database

In this section we investigate the influence of potential missing publications on the values of the diversity index. The main objective is to inspect whether or not the overall trend (of a decreasing diversity) is robust in light of a possible change in the publication list used to assemble the database. We do this in order to account for the possibility that some publications were not retrieved by the publication search. Our assumption is that the DOM-PM combinations that were studied in the publications analyzed herein are representative, in terms of identity and frequency, of the overall materials studied (i.e., the search queries used to retrieve the publications have no bias towards certain DOM-PM combinations). To perform the analysis, we employed the bootstrap approach by sampling with replacement the publications in the database. Subsequently, we obtained sets of publications, herein referred to as the bootstrap samples, that contain multiple instances (i.e. sampled with replacement) of certain publications and therefore differ from the list of publications that comprises the original database. For each bootstrap sample, similar to the original publication list, the studied DOM-PM combinations were extracted and the  $D_{\text{comb}}$  was calculated.

Under the assumption of representativeness described above, the variation in the  $D_{\text{comb}}$  of the bootstrap samples around the empirical  $D_{\text{comb}}$  reflects the variation in  $D_{\text{comb}}$  expected from a random sample of publications around the true  $D_{\text{comb}}$ . To assess the uncertainty in the  $D_{\text{comb}}$  of the original database, we calculated the 95% bootstrap confidence interval, which is given by:

$$D_i - \hat{\beta}_i \pm z_{0.975} \cdot \hat{v}_i^{\frac{1}{2}}, \quad (1)$$

where  $D_i$  is the calculated  $D_{\text{comb}}$  for the original publications list in the year  $i$ ,  $\hat{\beta}_i$  is the estimated bias of the calculated  $D_{\text{comb}}$  value in year  $i$ ,  $z_{0.975}$  is the 97.5% quantile of the standard normal distribution, and  $\hat{v}_i^{\frac{1}{2}}$  is the estimated standard error of the  $D_{\text{comb}}$  value in year  $i$ . Both  $\hat{\beta}_i$  and  $\hat{v}_i^{\frac{1}{2}}$  were estimated from the bootstrap samples.

To perform the bootstrap simulation, each combination of DOM-PM presented in the dataset was labeled as "new" or "old". Experiments labeled as "new" are those experiments carried out in year  $i$  that study DOM-PM combinations not studied in previous years. By using these labels, we avoid the situation where the set of PM-DOM combinations of the empirical network is the most diverse one compared to all possible bootstrap samples. In order to account for the temporal aspect, the sampling was stratified by years, which means that in the bootstrap samples each year contained only papers published within that given year. The total number of simulated bootstrap samples was 9999. The analysis was carried out using the *boot* function of the *boot* package in R; the code is given in Appendix B.

The resulting bootstrap 95% normal confidence interval is depicted in Figure S 9. The confidence interval still demonstrates a general trend of a decrease in  $D_{\text{comb}}$  over the analyzed period. The uncertainty in the  $D_{\text{comb}}$  estimates is reduced when the number of publications is higher, reflected by the decrease in the width of the confidence interval after the year 2010.

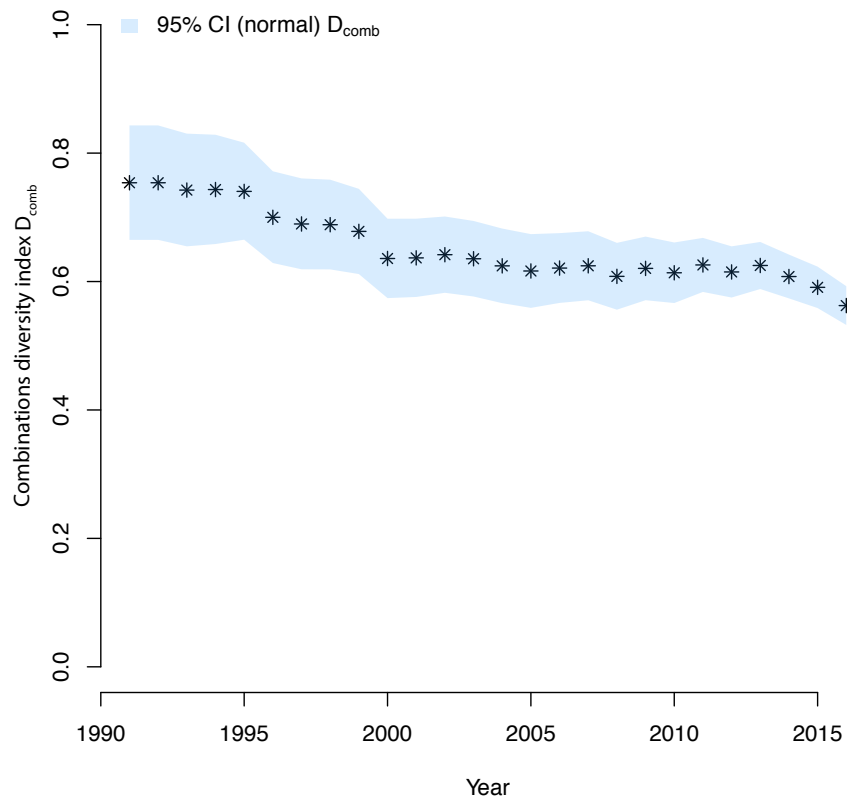

**Figure S 9.** The empirical  $D_{\text{comb}}$  values (asterisks) and the 95% bootstrap normal confidence interval of the  $D_{\text{comb}}$  obtained from the bootstrap samples.

### The effect of considering only experiments with humic substances as their DOM constituent

In the empirical network the various DOM types include both humic substances as well as other macromolecules. We here analyze a subset of the network (a “reduced” network) that is comprised of only the experiments that employ humic substances as their DOM constituent. Overall about 49% of the experiments employ humic substances as their DOM constituent (497 of 951 experiments).

Figure S 10 compares the subset network to the original empirical network, and Table S 4 compares their basic properties. The reduced network is smaller than the original network and its density is higher. This implies that in the reduced network there are more types of DOM-PM combinations that were studied relative to the network size, when compared to the original network. However, the diversity index,  $D_{\text{comb}}$ , is *lower* for the subset network compared to that of the original network, i.e. 0.48 compared to 0.56. The  $D_{\text{comb}}$  of the subset network implies that the tendency to focus on a small set of DOM-PM combinations is even stronger in the experiments that employ humic substances as DOM. Both networks, empirical and reduced, share the central DOM nodes (e.g. “river humic acid” and “aldrich humic acid”), which means that in both cases humic acids are the main focus of the experimental effort. Overall the strong focus towards humic acids creates similarly sparse networks that share similar topological features (i.e. core-periphery structure, which is reflected by the similar negative degree assortativity, Table S 4) and medium diversity of the PM-DOM combinations.

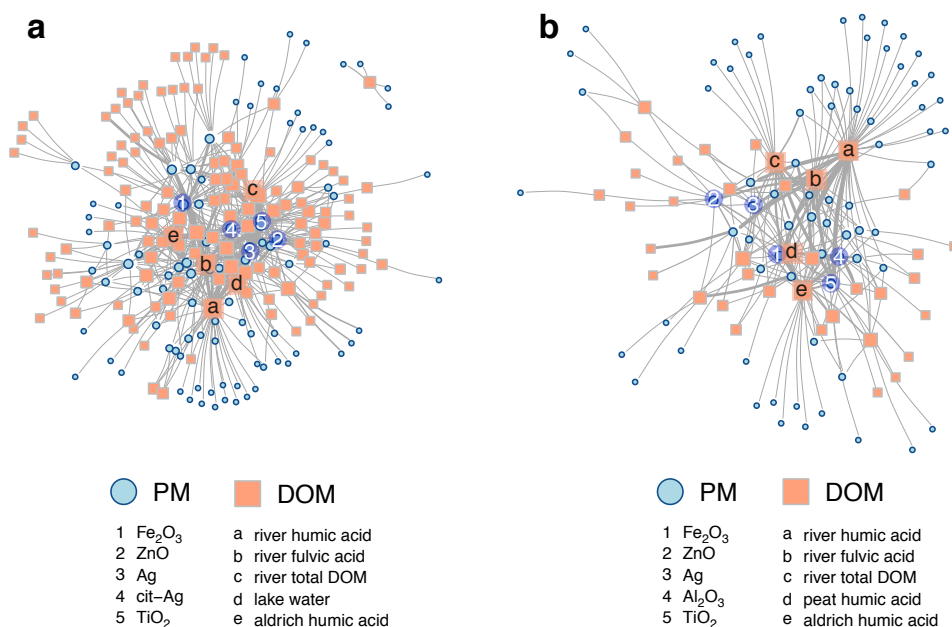

**Figure S 10.** Comparison between the original empirical network (**a**), and a reduced network containing only the experiments that employ humic substances as their DOM constituent (**b**). The materials listed in the respective legends are the ones that have the highest degree (i.e. were studied with the largest number of counterparts).

**Table S 4.** Basic properties of the full (empirical) and the reduced network in comparison.

|                        | all DOM | humic substances only |
|------------------------|---------|-----------------------|
| number of nodes        | 227     | 112                   |
| number of PM nodes     | 94      | 74                    |
| number of DOM nodes    | 133     | 38                    |
| number of combinations | 535     | 240                   |
| number of experiments  | 951     | 497                   |
| degree assortativity   | -0.311  | -0.412                |
| density                | 0.0428  | 0.0853                |
| combinations diversity | 0.563   | 0.483                 |

## Temporal dimension of the network's structure

Here we inspect whether or not the network's complex topology can be explained by temporal segregation, i.e. if specific regions in the network are more recent than others. To this end, we add a temporal dimension by coloring the links according to the latest publication year of the respective experiments (Figure S 11). We observe that the network is roughly split in half, where the first half has both core (central part) and some outer branches, all of which correspond to rather recent experiments. The other half, which is comprised of older experiments, contains more periphery nodes than central nodes. From this we conclude that recent experiments are not confined to any specific region in the network. Therefore, any imbalance between the study of central vs. peripheral materials cannot be explained by a temporal trend.

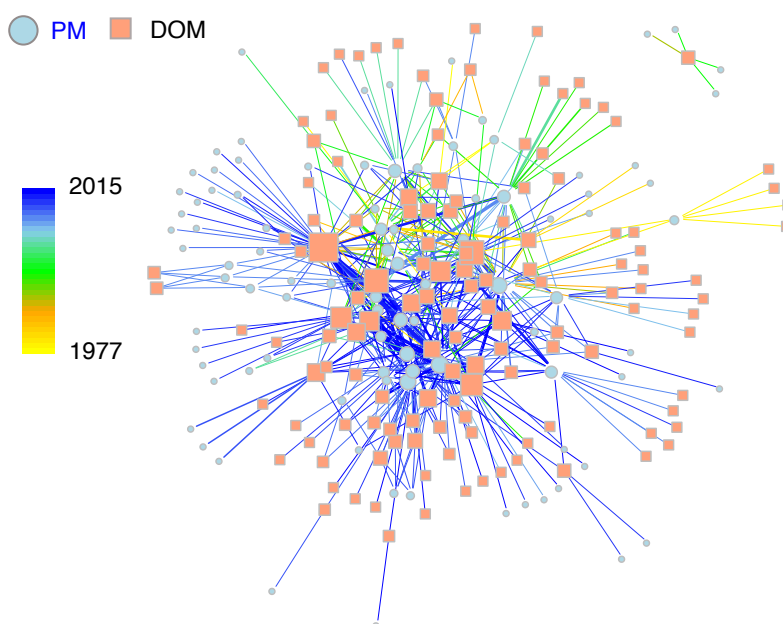

**Figure S 11.** The empirical network with links colored by latest year of publication. Size of nodes is proportional to their degree; width of links is proportional to the number of experiments studying the connected materials. The color of links corresponds (according to the legend) to the latest year the connected materials (i.e. PM and DOM) were studied together.

## Annex A: Principal component analysis – R output

```
1
2 Importance of components:
3           Comp.1      Comp.2      Comp.3
4 Standard deviation    1.4918198 0.8796544 0.0261146260
5 Proportion of Variance 0.7418421 0.2579306 0.0002273246
6 Cumulative Proportion 0.7418421 0.9997727 1.0000000000
7
8 Loadings:
9           Comp.1  Comp.2  Comp.3
10 Aliphatic.0..110ppm.  0.669      -0.740
11 Aroamtic.110..165.  -0.574 -0.588 -0.570
12 Carbonyl.165..220.  -0.473  0.806 -0.356
```

## Annex B: Bootstrap analysis – R code

```
1 d.data.nom.type$comb <- sapply(1:nrow(d.data.nom.type), function(x) paste(d.data.
2   nom.type$ENP[x], d.data.nom.type[x, nom.data.column], sep = "-"))
3 #Label each DOM-PM as "new" or "old"
4 d.data.nom.type$label.diversity <- rep("old", nrow(d.data.nom.type))
5 for(i in unique(d.data.nom.type$year)){
6   #this loop assigns the label "new" or "old" to each DOM-ENP combination,
7   #based on the first definition of diversity
8   #unique(d.data.nom.type$comb[!d.data.nom.type$comb[d.data.nom.type$year == i]%in%
9     d.data.nom.type$comb[d.data.nom.type$year < i]])
10  #this year combinations:
11  current.comb <- unique(d.data.nom.type$comb[d.data.nom.type$year == i])
12  n.new.comb <- sum(!current.comb%in%d.data.nom.type$comb[d.data.nom.type$year < i
13    ])#the number of unique and new comb added in the current year
14  #now assign the label: "new" to n.new.comb and label: "old" to the rest of the
15  combination in this year
16  relv.rows <- which(d.data.nom.type$year == i)#the rows the correspond to
17  experiments that were published in year i
18  #assign "new" label to the first n.new.comb rows from relv.rows and all the rest
19  assign the label: "old"
20  d.data.nom.type$label.diversity[relv.rows] <- c(rep("new", n.new.comb), rep("old"
21    , length(relv.rows)-n.new.comb))
22 }
23 #The following is a function to measure materials' diversity.
24 diversity.func.boot <- function(d.data, year.start){
25   #This function calculates the diversity according to the first definition of the
26   diversity index. It takes as arguments the dataset and the year from which to
27   start the calculations
28   diversity.trend <- c() # place holder for the trend values to be computed below
29   for(year in year.start:max(d.data$year)){
30     d.data.slice <- d.data[d.data$year <= year, "label.diversity"]
31     n.experiments <- length(d.data.slice)#the number of experiments done up to the
32     given year
33     n.com <- sum(d.data.slice == "new")#the number of unique combinations studied
34     up to the given year
35     diversity.trend <- c(diversity.trend, n.com/n.experiments)
36   }
37   return(diversity.trend)
```

```

27 }
28
29 bootstrap.publications <- function(data, i, year = 1990){
30   #this function takes the data set of all DOIs and the index of the lines that are
      being resampled, where resampling is stratified by years and calculates the
      diversity index over the years. Arguments: data = dataset, i = resampled rows,
      year = the year from which diversity should be calculated, by default is set to
      1990
31   data <- data[i,]
32   diversity.trend <- diversity.func.boot(d.data = data, year.start = year)
33 }
34 #####
35 R <- 9999
36 set.seed(1)
37 publication.boot <- boot(d.data.nom.type, bootstrap.publications, R = R, strata =
      factor(d.data.nom.type$year))
38 #95% normal bootstrap confidence interval:
39 publication.boot.ci.normal <- sapply(1:length(publication.boot$t0), function(x) {
      boot.ci(boot.out = publication.boot, type = c("norm"), index = x, conf = 0.95)$
      normal[2:3]})

```

## References

1. Malcolm RL (1990) The uniqueness of humic substances in each of soil, stream and marine environments. *Anal Chim Acta* 232:19–30.
2. Esteves VI, Otero M, Duarte AC (2009) Comparative characterization of humic substances from the open ocean, estuarine water and fresh water. *Org Geochem* 40(9):942–950.
3. International Humic Substances Society (2016) Available at: <http://www.humicsubstances.org> [Accessed: May 18, 2016].
